# Supplementary material for: Application of weighted co-expression network analysis and machine learning to identify the pathological mechanism of Alzheimer's disease
Source: Front Aging Neurosci. 2022 Jul 13;14:837770. doi: 10.3389/fnagi.2022.837770 (PMC9326231; doi:10.3389/fnagi.2022.837770)
Supplement: Supplementary file 2 [file Table_2.CSV]

	meanImp	medianImp	minImp	maxImp	normHits	decision	gene
APOLIPOPROTEIN	-0.0448505506165715	0	-1.43112548762424	1.02597835208515	0	Rejected	APOLIPOPROTEIN
AGING	-0.186238054442899	-0.352604171071251	-1.39447129979304	1.85022715903838	0.0202020202020202	Rejected	AGING
AMPA	0.262523621000151	0.202893986739527	-1.87211099509047	2.18321325029954	0.0202020202020202	Rejected	AMPA
AMYLOID	1.27783257114281	1.38358910990142	-1.40642169281549	3.35058019954282	0.474747474747475	Tentative	AMYLOID
insulin	-0.0509117967405301	0	-1.42973903925149	1.02597835208515	0	Rejected	insulin
nftgo	-0.0994018930687146	0	-1.74422957883476	1.47793786787433	0.0303030303030303	Rejected	nftgo
AXONAL	0.10336551746286	0.20216521897951	-2.36004663666395	1.87285247935712	0.0202020202020202	Rejected	AXONAL
nfthp	0.0724032569442828	0	-1.42849878134269	1.46962350117129	0.0101010101010101	Rejected	nfthp
NEUROINFLAMMATION	-0.172466982082405	0	-2.08403671970215	1.48785457009552	0.0202020202020202	Rejected	NEUROINFLAMMATION
NICOTINE	-0.0650949093745453	0	-1.02597835208515	1.02597835208515	0	Rejected	NICOTINE
OXIDATIVEDAMAGE	2.54868365730595	2.48623354974837	0.909906270301458	5.2592615492458	0.929292929292929	Confirmed	OXIDATIVEDAMAGE
OXIDATIVESTRESS	-0.313720347102615	-0.390503103653566	-1.46406619180783	1.02597835208515	0	Rejected	OXIDATIVESTRESS
